# Supplementary material for: 2D WS2 co-catalysts induce the growth of CdS and enhance the photocatalytic performance
Source: Royal Society of Chemistry journal article supplement (doi:10.1039/d1ce00562f), 2021-01-01
Supplement: d1ce00562f1.pdf [file d1ce00562f1.pdf]

## Supporting Information

### 2D WS<sub>2</sub> co-catalysts induce the growth of CdS and enhance the photocatalytic performance

Wenxuan Ma<sup>a</sup>, Shuhua Hao<sup>a</sup>, Lei Zhang<sup>b</sup>, Baoyi Lv<sup>a</sup>, Gang Zhao<sup>a,\*</sup>, Jinzhao Huang<sup>a</sup>,  
Xijin Xu<sup>a,\*</sup>

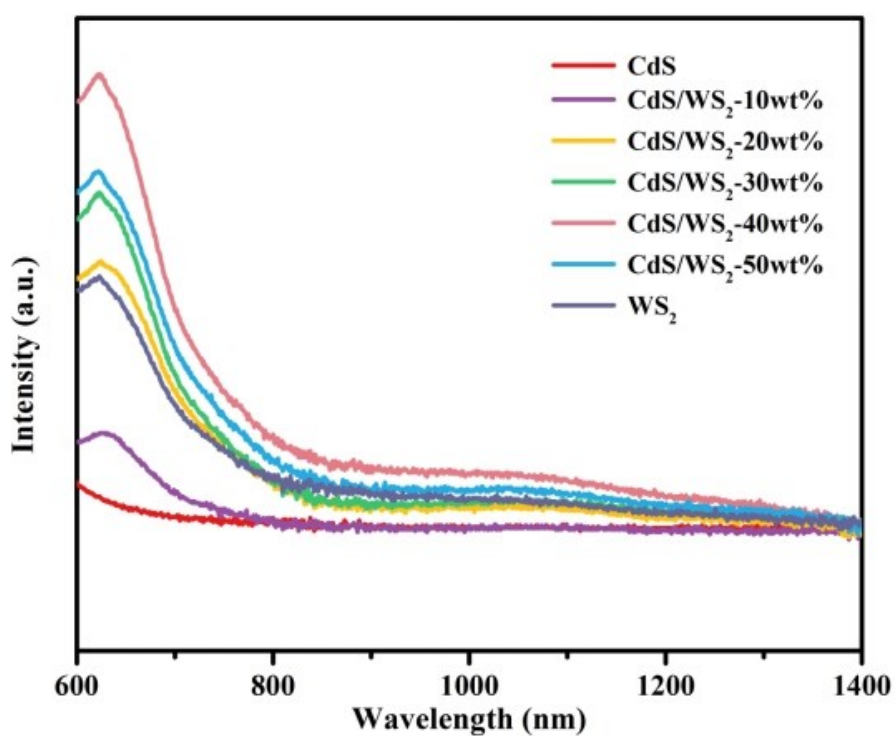

Figure S1 UV-vis of CdS nanoparticles and as-obtained products.

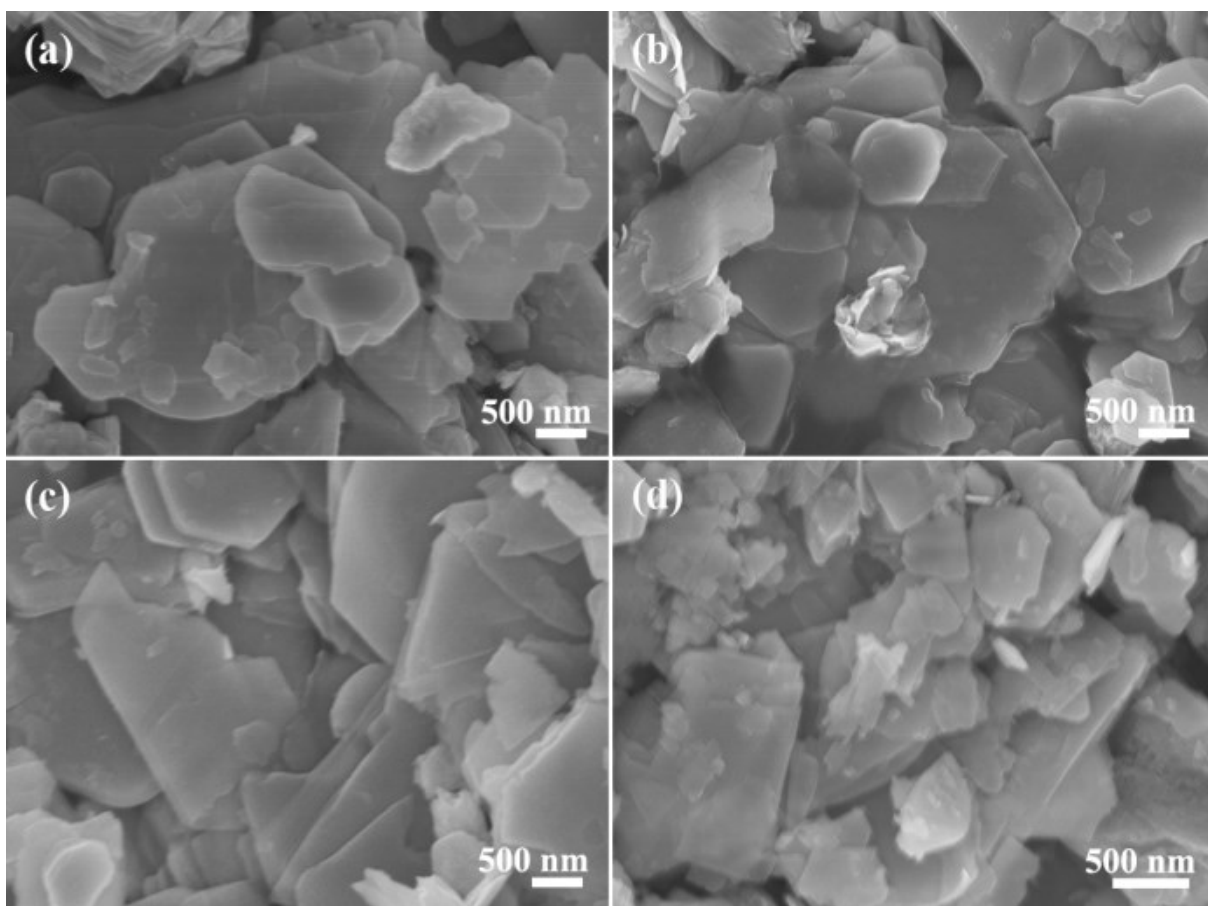

**Figure S2** SEM images of ultrasonic WS<sub>2</sub> (a) 3 h. (b) 6 h. (c) 9 h. (d) 12 h.
